# Supplementary material
Source: publisher figshare collection journal article supplement (https://acs.figshare.com/ndownloader/files/4595962)
Supplement: Supplementary file 1 [file 4595962]

 


data_fecl2pnp 


_audit_creation_method            SHELXL-97 


_chemical_name_systematic 


; 


 ? 


; 


_chemical_name_common             ? 


_chemical_melting_point           ? 


_chemical_formula_moiety          ? 


_chemical_formula_sum 


 'C23 H43 Cl2 Fe N P2' 


_chemical_formula_weight          522.27 


 


loop_ 


 _atom_type_symbol 


 _atom_type_description 


 _atom_type_scat_dispersion_real 


 _atom_type_scat_dispersion_imag 


 _atom_type_scat_source 


 'C'  'C'   0.0033   0.0016 


 'International Tables Vol C Tables 4.2.6.8 and 6.1.1.4' 


 'H'  'H'   0.0000   0.0000 


 'International Tables Vol C Tables 4.2.6.8 and 6.1.1.4' 


 'N'  'N'   0.0061   0.0033 


 'International Tables Vol C Tables 4.2.6.8 and 6.1.1.4' 


 'P'  'P'   0.1023   0.0942 


 'International Tables Vol C Tables 4.2.6.8 and 6.1.1.4' 


 'Cl'  'Cl'   0.1484   0.1585 


 'International Tables Vol C Tables 4.2.6.8 and 6.1.1.4' 


 'Fe'  'Fe'   0.3463   0.8444 


 'International Tables Vol C Tables 4.2.6.8 and 6.1.1.4' 


 


_symmetry_cell_setting            Monoclinic


_symmetry_space_group_name_H-M    'P2(1)/n '


 


loop_ 


 _symmetry_equiv_pos_as_xyz 


 'x, y, z' 


 '-x+1/2, y+1/2, -z+1/2' 


 '-x, -y, -z' 


 'x-1/2, -y-1/2, z-1/2' 


 


_cell_length_a                    12.0831(9) 


_cell_length_b                    15.5084(12) 


_cell_length_c                    14.5049(11) 


_cell_angle_alpha                 90.00 


_cell_angle_beta                  91.093(2) 


_cell_angle_gamma                 90.00 


_cell_volume                      2717.6(4) 


_cell_formula_units_Z             4 


_cell_measurement_temperature     100(2) 


_cell_measurement_reflns_used     5464


_cell_measurement_theta_min       5.1


_cell_measurement_theta_max       10.9


 


_exptl_crystal_description        lathe


_exptl_crystal_colour             colourless


_exptl_crystal_size_max           0.21 


_exptl_crystal_size_mid           0.06 


_exptl_crystal_size_min           0.03 


_exptl_crystal_density_meas       ? 


_exptl_crystal_density_diffrn     1.277 


_exptl_crystal_density_method     'not measured' 


_exptl_crystal_F_000              1112 


_exptl_absorpt_coefficient_mu     0.880 


_exptl_absorpt_correction_type    'multi-scan (Bruker-AXS, 2000)'


_exptl_absorpt_correction_T_min   0.8338 


_exptl_absorpt_correction_T_max   0.9999


_exptl_absorpt_process_details    'SADABS'


 


_exptl_special_details 


; 


 The crystals had an extremely light yellow tint, but turned to colourless 


 at a lower tepmerature.  The crystal had a minor component extra-growth 


 twin that was ignored during data processing and structural refinement. 


; 


 


_diffrn_ambient_temperature       100(2) 


_diffrn_radiation_wavelength      0.71073 


_diffrn_radiation_type            MoK\a 


_diffrn_radiation_source          'fine-focus sealed tube' 


_diffrn_radiation_monochromator   graphite 


_diffrn_measurement_device_type   'Bruker SMART APEX CCD area detector'


_diffrn_measurement_method        'omega scans' 


_diffrn_detector_area_resol_mean  ? 


_diffrn_standards_number          0 


_diffrn_standards_interval_count  0 


_diffrn_standards_interval_time   ? 


_diffrn_standards_decay_%         0 


_diffrn_reflns_number             31924 


_diffrn_reflns_av_R_equivalents   0.0456 


_diffrn_reflns_av_sigmaI/netI     0.0489 


_diffrn_reflns_limit_h_min        -17 


_diffrn_reflns_limit_h_max        17 


_diffrn_reflns_limit_k_min        -22 


_diffrn_reflns_limit_k_max        22 


_diffrn_reflns_limit_l_min        -20 


_diffrn_reflns_limit_l_max        20 


_diffrn_reflns_theta_min          1.92 


_diffrn_reflns_theta_max          30.57 


_reflns_number_total              8292 


_reflns_number_gt                 6448 


_reflns_threshold_expression      >2sigma(I) 


 


_computing_data_collection        'SMART (Bruker-AXS, 2000)'


_computing_cell_refinement        'SAINT (Bruker-AXS, 2000)'


_computing_data_reduction         'SAINT (Bruker-AXS, 2000)'


_computing_structure_solution     'SHELXS-97 (Sheldrick, 1990)' 


_computing_structure_refinement   'SHELXL-97 (Sheldrick, 1997)' 


_computing_molecular_graphics     'SHELXTL (Bruker-AXS, 2000)'


_computing_publication_material   'SHELXTL (Bruker-AXS, 2000)'


 


_refine_special_details 


; 


 Refinement of F^2^ against ALL reflections.  The weighted R-factor wR and 


 goodness of fit S are based on F^2^, conventional R-factors R are based 


 on F, with F set to zero for negative F^2^. The threshold expression of 


 F^2^ > 2sigma(F^2^) is used only for calculating R-factors(gt) etc. and is 


 not relevant to the choice of reflections for refinement.  R-factors based 


 on F^2^ are statistically about twice as large as those based on F, and 


 R-factors based on ALL data will be even larger.  All non-H atoms were 


 refined anisotropically; all H atoms were refined isotropically without 


 constraints.  No restraints were used in the refinement.  No reflections 


 were omitted in the refinement.


; 


 


_refine_ls_structure_factor_coef  Fsqd  


_refine_ls_matrix_type            full 


_refine_ls_weighting_scheme       calc  


_refine_ls_weighting_details 


 'calc w=1/[\s^2^(Fo^2^)+(0.0365P)^2^+0.4652P] where P=(Fo^2^+2Fc^2^)/3' 


_atom_sites_solution_primary      direct 


_atom_sites_solution_secondary    difmap 


_atom_sites_solution_hydrogens    geom 


_refine_ls_hydrogen_treatment     mixed 


_refine_ls_extinction_method      none 


_refine_ls_extinction_coef        ? 


_refine_ls_number_reflns          8292 


_refine_ls_number_parameters      434 


_refine_ls_number_restraints      0 


_refine_ls_R_factor_all           0.0534 


_refine_ls_R_factor_gt            0.0349 


_refine_ls_wR_factor_ref          0.0823 


_refine_ls_wR_factor_gt           0.0753 


_refine_ls_goodness_of_fit_ref    1.012 


_refine_ls_restrained_S_all       1.012 


_refine_ls_shift/su_max           0.002 


_refine_ls_shift/su_mean          0.000 


 


loop_ 


 _atom_site_label 


 _atom_site_type_symbol 


 _atom_site_fract_x 


 _atom_site_fract_y 


 _atom_site_fract_z 


 _atom_site_U_iso_or_equiv 


 _atom_site_adp_type 


 _atom_site_occupancy 


 _atom_site_symmetry_multiplicity 


 _atom_site_calc_flag 


 _atom_site_refinement_flags 


 _atom_site_disorder_assembly 


 _atom_site_disorder_group 


Fe1 Fe 0.890239(17) 0.183377(14) 0.229807(15) 0.01257(6) Uani 1 1 d . . . 


Cl1 Cl 0.86075(3) 0.29229(3) 0.34246(3) 0.01977(9) Uani 1 1 d . . . 


Cl2 Cl 0.87297(3) 0.24687(3) 0.08674(3) 0.01865(9) Uani 1 1 d . . . 


P1 P 0.72058(3) 0.09155(3) 0.24842(3) 0.01270(8) Uani 1 1 d . . . 


P2 P 1.09551(3) 0.17728(3) 0.26195(3) 0.01303(8) Uani 1 1 d . . . 


N1 N 0.94904(10) 0.04824(8) 0.18076(9) 0.0133(2) Uani 1 1 d . . . 


C2 C 0.87942(13) -0.01938(10) 0.17485(11) 0.0150(3) Uani 1 1 d . . . 


C3 C 0.90461(14) -0.09304(11) 0.12463(12) 0.0189(3) Uani 1 1 d . . . 


H3 H 0.8521(16) -0.1356(13) 0.1206(13) 0.022(5) Uiso 1 1 d . . . 


C4 C 1.00637(14) -0.09885(11) 0.08304(12) 0.0195(3) Uani 1 1 d . . . 


H4 H 1.0266(16) -0.1502(12) 0.0494(13) 0.021(5) Uiso 1 1 d . . . 


C5 C 1.08022(13) -0.03135(11) 0.09347(11) 0.0167(3) Uani 1 1 d . . . 


H5 H 1.1491(16) -0.0333(12) 0.0690(13) 0.019(5) Uiso 1 1 d . . . 


C6 C 1.04983(12) 0.04121(10) 0.14255(10) 0.0143(3) Uani 1 1 d . . . 


C7 C 0.77722(13) -0.01714(10) 0.23270(12) 0.0170(3) Uani 1 1 d . . . 


H7A H 0.7999(16) -0.0375(12) 0.2920(14) 0.021(5) Uiso 1 1 d . . . 


H7B H 0.7247(16) -0.0584(13) 0.2105(14) 0.027(5) Uiso 1 1 d . . . 


C8 C 1.13133(13) 0.11395(11) 0.15916(11) 0.0162(3) Uani 1 1 d . . . 


H8A H 1.1242(16) 0.1554(13) 0.1097(14) 0.022(5) Uiso 1 1 d . . . 


H8B H 1.2070(16) 0.0908(12) 0.1619(13) 0.022(5) Uiso 1 1 d . . . 


C9 C 0.65934(13) 0.08367(10) 0.36609(11) 0.0154(3) Uani 1 1 d . . . 


C10 C 0.75868(15) 0.08817(13) 0.43387(12) 0.0212(3) Uani 1 1 d . . . 


H10A H 0.7335(16) 0.0865(12) 0.4960(14) 0.024(5) Uiso 1 1 d . . . 


H10B H 0.7970(16) 0.1419(14) 0.4299(14) 0.026(5) Uiso 1 1 d . . . 


H10C H 0.8063(16) 0.0392(13) 0.4278(13) 0.024(5) Uiso 1 1 d . . . 


C11 C 0.58554(15) 0.16214(12) 0.38330(13) 0.0208(3) Uani 1 1 d . . . 


H11A H 0.5185(17) 0.1601(13) 0.3444(14) 0.025(5) Uiso 1 1 d . . . 


H11B H 0.6279(18) 0.2158(14) 0.3699(15) 0.033(6) Uiso 1 1 d . . . 


H11C H 0.5626(16) 0.1618(13) 0.4447(15) 0.027(5) Uiso 1 1 d . . . 


C12 C 0.59502(15) 0.00056(12) 0.38437(13) 0.0215(3) Uani 1 1 d . . . 


H12A H 0.5743(16) 0.0004(13) 0.4482(14) 0.021(5) Uiso 1 1 d . . . 


H12B H 0.6384(17) -0.0521(14) 0.3730(14) 0.031(6) Uiso 1 1 d . . . 


H12C H 0.5274(17) -0.0033(13) 0.3483(14) 0.024(5) Uiso 1 1 d . . . 


C13 C 0.61139(13) 0.10122(11) 0.15518(11) 0.0188(3) Uani 1 1 d . . . 


C14 C 0.57856(15) 0.19638(13) 0.14612(14) 0.0244(4) Uani 1 1 d . . . 


H14A H 0.5257(19) 0.2025(14) 0.0949(16) 0.036(6) Uiso 1 1 d . . . 


H14B H 0.6410(19) 0.2341(14) 0.1333(15) 0.035(6) Uiso 1 1 d . . . 


H14C H 0.5438(16) 0.2174(12) 0.1993(14) 0.019(5) Uiso 1 1 d . . . 


C15 C 0.50830(15) 0.04519(14) 0.16916(13) 0.0257(4) Uani 1 1 d . . . 


H15A H 0.4659(15) 0.0649(12) 0.2237(13) 0.018(5) Uiso 1 1 d . . . 


H15B H 0.5291(16) -0.0172(13) 0.1761(13) 0.023(5) Uiso 1 1 d . . . 


H15C H 0.4622(17) 0.0516(13) 0.1147(14) 0.027(5) Uiso 1 1 d . . . 


C16 C 0.66617(16) 0.07226(14) 0.06524(12) 0.0256(4) Uani 1 1 d . . . 


H16A H 0.6116(17) 0.0851(14) 0.0162(15) 0.033(6) Uiso 1 1 d . . . 


H16B H 0.6824(17) 0.0119(15) 0.0645(14) 0.029(6) Uiso 1 1 d . . . 


H16C H 0.7351(18) 0.1034(14) 0.0526(14) 0.033(6) Uiso 1 1 d . . . 


C17 C 1.14593(13) 0.11207(11) 0.36407(11) 0.0175(3) Uani 1 1 d . . . 


C18 C 1.10048(16) 0.15314(13) 0.45211(12) 0.0239(4) Uani 1 1 d . . . 


H18A H 1.0189(18) 0.1637(13) 0.4486(14) 0.029(5) Uiso 1 1 d . . . 


H18B H 1.1361(18) 0.2116(15) 0.4665(15) 0.034(6) Uiso 1 1 d . . . 


H18C H 1.1131(17) 0.1147(14) 0.5025(15) 0.030(6) Uiso 1 1 d . . . 


C19 C 1.09635(16) 0.02106(12) 0.35603(13) 0.0223(4) Uani 1 1 d . . . 


H19A H 1.1134(18) -0.0104(15) 0.4098(16) 0.038(6) Uiso 1 1 d . . . 


H19B H 1.1258(16) -0.0095(13) 0.3041(14) 0.022(5) Uiso 1 1 d . . . 


H19C H 1.0163(18) 0.0205(13) 0.3513(14) 0.028(5) Uiso 1 1 d . . . 


C20 C 1.27200(15) 0.10395(14) 0.37298(14) 0.0250(4) Uani 1 1 d . . . 


H20A H 1.2896(18) 0.0645(15) 0.4215(16) 0.035(6) Uiso 1 1 d . . . 


H20B H 1.3059(17) 0.1564(14) 0.3858(14) 0.029(6) Uiso 1 1 d . . . 


H20C H 1.3026(16) 0.0815(13) 0.3176(14) 0.025(5) Uiso 1 1 d . . . 


C21 C 1.17992(13) 0.27845(11) 0.24796(12) 0.0182(3) Uani 1 1 d . . . 


C22 C 1.18305(16) 0.32901(13) 0.33852(14) 0.0259(4) Uani 1 1 d . . . 


H22A H 1.2303(18) 0.3033(14) 0.3831(16) 0.035(6) Uiso 1 1 d . . . 


H22B H 1.1106(19) 0.3350(14) 0.3612(16) 0.036(6) Uiso 1 1 d . . . 


H22C H 1.2095(16) 0.3867(14) 0.3268(14) 0.026(5) Uiso 1 1 d . . . 


C23 C 1.11667(16) 0.33353(12) 0.17636(14) 0.0237(4) Uani 1 1 d . . . 


H23A H 1.0452(17) 0.3492(13) 0.1987(14) 0.025(5) Uiso 1 1 d . . . 


H23B H 1.1110(17) 0.3052(13) 0.1179(15) 0.028(6) Uiso 1 1 d . . . 


H23C H 1.1612(16) 0.3884(13) 0.1667(14) 0.025(5) Uiso 1 1 d . . . 


C24 C 1.29755(15) 0.26320(13) 0.21377(16) 0.0272(4) Uani 1 1 d . . . 


H24A H 1.3337(17) 0.3188(14) 0.2069(14) 0.028(6) Uiso 1 1 d . . . 


H24B H 1.2954(18) 0.2369(15) 0.1532(16) 0.037(6) Uiso 1 1 d . . . 


H24C H 1.3405(19) 0.2283(15) 0.2583(16) 0.041(6) Uiso 1 1 d . . . 


 


loop_ 


 _atom_site_aniso_label 


 _atom_site_aniso_U_11 


 _atom_site_aniso_U_22 


 _atom_site_aniso_U_33 


 _atom_site_aniso_U_23 


 _atom_site_aniso_U_13 


 _atom_site_aniso_U_12 


Fe1 0.00995(10) 0.01175(11) 0.01602(11) 0.00063(8) 0.00052(8) 0.00110(8) 


Cl1 0.01870(19) 0.01546(18) 0.0252(2) -0.00447(15) 0.00244(15) 0.00250(14) 


Cl2 0.01737(18) 0.02036(19) 0.01822(18) 0.00398(15) 0.00031(14) 0.00043(14) 


P1 0.01114(18) 0.01286(18) 0.01416(18) -0.00012(14) 0.00177(14) 0.00032(14) 


P2 0.01004(17) 0.01354(18) 0.01547(19) -0.00062(15) -0.00047(14) 0.00093(14) 


N1 0.0114(6) 0.0133(6) 0.0151(6) -0.0005(5) -0.0004(5) 0.0014(5) 


C2 0.0134(7) 0.0147(7) 0.0169(7) 0.0000(6) -0.0002(6) 0.0017(6) 


C3 0.0196(8) 0.0147(8) 0.0224(8) -0.0027(6) 0.0009(6) 0.0003(6) 


C4 0.0213(8) 0.0165(8) 0.0207(8) -0.0037(6) 0.0003(6) 0.0051(6) 


C5 0.0149(7) 0.0198(8) 0.0154(7) -0.0014(6) 0.0010(6) 0.0053(6) 


C6 0.0126(7) 0.0167(7) 0.0136(7) 0.0016(6) 0.0002(5) 0.0019(6) 


C7 0.0162(7) 0.0127(7) 0.0223(8) -0.0022(6) 0.0034(6) -0.0011(6) 


C8 0.0114(7) 0.0186(8) 0.0186(8) -0.0014(6) 0.0025(6) 0.0007(6) 


C9 0.0138(7) 0.0169(8) 0.0155(7) 0.0015(6) 0.0034(6) 0.0012(6) 


C10 0.0209(8) 0.0261(9) 0.0166(8) 0.0028(7) -0.0006(6) 0.0011(7) 


C11 0.0189(8) 0.0221(9) 0.0216(9) -0.0020(7) 0.0047(7) 0.0036(7) 


C12 0.0222(9) 0.0203(9) 0.0223(9) 0.0037(7) 0.0065(7) -0.0032(7) 


C13 0.0129(7) 0.0270(9) 0.0164(8) 0.0016(6) 0.0004(6) -0.0011(6) 


C14 0.0162(8) 0.0320(10) 0.0249(9) 0.0082(8) 0.0010(7) 0.0063(7) 


C15 0.0162(8) 0.0370(11) 0.0238(9) 0.0008(8) -0.0021(7) -0.0068(7) 


C16 0.0212(9) 0.0382(11) 0.0173(8) -0.0025(8) 0.0000(7) -0.0037(8) 


C17 0.0139(7) 0.0207(8) 0.0179(8) 0.0004(6) -0.0025(6) 0.0016(6) 


C18 0.0243(9) 0.0293(10) 0.0182(8) -0.0011(7) -0.0014(7) 0.0035(7) 


C19 0.0257(9) 0.0208(9) 0.0202(9) 0.0043(7) -0.0052(7) 0.0003(7) 


C20 0.0157(8) 0.0322(10) 0.0270(10) 0.0049(8) -0.0044(7) 0.0036(7) 


C21 0.0134(7) 0.0168(8) 0.0243(8) -0.0003(6) 0.0004(6) -0.0023(6) 


C22 0.0227(9) 0.0215(9) 0.0332(10) -0.0060(8) -0.0038(8) -0.0032(7) 


C23 0.0221(9) 0.0178(9) 0.0310(10) 0.0053(7) -0.0015(7) -0.0034(7) 


C24 0.0147(8) 0.0271(10) 0.0398(11) 0.0027(9) 0.0041(8) -0.0028(7) 


 


_geom_special_details 


; 


 All esds (except the esd in the dihedral angle between two l.s. planes) 


 are estimated using the full covariance matrix.  The cell esds are taken 


 into account individually in the estimation of esds in distances, angles 


 and torsion angles; correlations between esds in cell parameters are only 


 used when they are defined by crystal symmetry.  An approximate (isotropic) 


 treatment of cell esds is used for estimating esds involving l.s. planes. 


; 


 


loop_ 


 _geom_bond_atom_site_label_1 


 _geom_bond_atom_site_label_2 


 _geom_bond_distance 


 _geom_bond_site_symmetry_2 


 _geom_bond_publ_flag 


Fe1 Cl2 2.3028(5) . ? 


Fe1 N1 2.3286(13) . ? 


Fe1 Cl1 2.3816(5) . ? 


Fe1 P1 2.5149(5) . ? 


Fe1 P2 2.5168(5) . ? 


P1 C7 1.8351(16) . ? 


P1 C9 1.8772(16) . ? 


P1 C13 1.8774(17) . ? 


P2 C8 1.8438(17) . ? 


P2 C21 1.8843(17) . ? 


P2 C17 1.8851(17) . ? 


N1 C2 1.346(2) . ? 


N1 C6 1.3520(19) . ? 


C2 C3 1.392(2) . ? 


C2 C7 1.507(2) . ? 


C3 C4 1.383(2) . ? 


C3 H3 0.917(19) . ? 


C4 C5 1.382(2) . ? 


C4 H4 0.967(19) . ? 


C5 C6 1.385(2) . ? 


C5 H5 0.912(19) . ? 


C6 C8 1.514(2) . ? 


C7 H7A 0.95(2) . ? 


C7 H7B 0.95(2) . ? 


C8 H8A 0.97(2) . ? 


C8 H8B 0.982(19) . ? 


C9 C12 1.531(2) . ? 


C9 C11 1.532(2) . ? 


C9 C10 1.539(2) . ? 


C10 H10A 0.96(2) . ? 


C10 H10B 0.96(2) . ? 


C10 H10C 0.96(2) . ? 


C11 H11A 0.98(2) . ? 


C11 H11B 1.00(2) . ? 


C11 H11C 0.94(2) . ? 


C12 H12A 0.96(2) . ? 


C12 H12B 0.99(2) . ? 


C12 H12C 0.96(2) . ? 


C13 C14 1.533(3) . ? 


C13 C15 1.535(2) . ? 


C13 C16 1.541(2) . ? 


C14 H14A 0.97(2) . ? 


C14 H14B 0.97(2) . ? 


C14 H14C 0.943(19) . ? 


C15 H15A 0.998(19) . ? 


C15 H15B 1.00(2) . ? 


C15 H15C 0.96(2) . ? 


C16 H16A 0.98(2) . ? 


C16 H16B 0.96(2) . ? 


C16 H16C 0.98(2) . ? 


C17 C20 1.531(2) . ? 


C17 C19 1.537(2) . ? 


C17 C18 1.538(2) . ? 


C18 H18A 1.00(2) . ? 


C18 H18B 1.02(2) . ? 


C18 H18C 0.95(2) . ? 


C19 H19A 0.94(2) . ? 


C19 H19B 0.96(2) . ? 


C19 H19C 0.97(2) . ? 


C20 H20A 0.95(2) . ? 


C20 H20B 0.93(2) . ? 


C20 H20C 0.96(2) . ? 


C21 C22 1.530(3) . ? 


C21 C24 1.533(2) . ? 


C21 C23 1.537(2) . ? 


C22 H22A 0.94(2) . ? 


C22 H22B 0.95(2) . ? 


C22 H22C 0.97(2) . ? 


C23 H23A 0.96(2) . ? 


C23 H23B 0.96(2) . ? 


C23 H23C 1.02(2) . ? 


C24 H24A 0.97(2) . ? 


C24 H24B 0.97(2) . ? 


C24 H24C 0.98(2) . ? 


 


loop_ 


 _geom_angle_atom_site_label_1 


 _geom_angle_atom_site_label_2 


 _geom_angle_atom_site_label_3 


 _geom_angle 


 _geom_angle_site_symmetry_1 


 _geom_angle_site_symmetry_3 


 _geom_angle_publ_flag 


Cl2 Fe1 N1 97.61(3) . . ? 


Cl2 Fe1 Cl1 107.628(17) . . ? 


N1 Fe1 Cl1 153.95(3) . . ? 


Cl2 Fe1 P1 106.190(16) . . ? 


N1 Fe1 P1 77.13(3) . . ? 


Cl1 Fe1 P1 101.249(16) . . ? 


Cl2 Fe1 P2 104.774(16) . . ? 


N1 Fe1 P2 73.59(3) . . ? 


Cl1 Fe1 P2 93.402(16) . . ? 


P1 Fe1 P2 139.582(16) . . ? 


C7 P1 C9 101.98(7) . . ? 


C7 P1 C13 104.04(8) . . ? 


C9 P1 C13 112.11(7) . . ? 


C7 P1 Fe1 101.54(5) . . ? 


C9 P1 Fe1 118.08(5) . . ? 


C13 P1 Fe1 116.14(5) . . ? 


C8 P2 C21 102.74(7) . . ? 


C8 P2 C17 105.80(8) . . ? 


C21 P2 C17 111.33(7) . . ? 


C8 P2 Fe1 96.66(5) . . ? 


C21 P2 Fe1 118.84(5) . . ? 


C17 P2 Fe1 117.92(5) . . ? 


C2 N1 C6 118.54(13) . . ? 


C2 N1 Fe1 121.78(10) . . ? 


C6 N1 Fe1 118.70(10) . . ? 


N1 C2 C3 122.02(14) . . ? 


N1 C2 C7 117.67(14) . . ? 


C3 C2 C7 120.02(14) . . ? 


C4 C3 C2 119.14(16) . . ? 


C4 C3 H3 123.0(12) . . ? 


C2 C3 H3 117.8(12) . . ? 


C5 C4 C3 118.72(15) . . ? 


C5 C4 H4 120.6(11) . . ? 


C3 C4 H4 120.6(11) . . ? 


C4 C5 C6 119.66(15) . . ? 


C4 C5 H5 121.7(12) . . ? 


C6 C5 H5 118.7(12) . . ? 


N1 C6 C5 121.73(15) . . ? 


N1 C6 C8 117.59(14) . . ? 


C5 C6 C8 120.62(14) . . ? 


C2 C7 P1 113.70(11) . . ? 


C2 C7 H7A 105.7(12) . . ? 


P1 C7 H7A 107.1(12) . . ? 


C2 C7 H7B 110.1(12) . . ? 


P1 C7 H7B 114.3(12) . . ? 


H7A C7 H7B 105.2(16) . . ? 


C6 C8 P2 111.32(11) . . ? 


C6 C8 H8A 109.3(12) . . ? 


P2 C8 H8A 103.1(12) . . ? 


C6 C8 H8B 109.7(11) . . ? 


P2 C8 H8B 113.2(11) . . ? 


H8A C8 H8B 110.0(16) . . ? 


C12 C9 C11 109.97(14) . . ? 


C12 C9 C10 108.67(14) . . ? 


C11 C9 C10 108.01(14) . . ? 


C12 C9 P1 115.00(12) . . ? 


C11 C9 P1 109.71(11) . . ? 


C10 C9 P1 105.18(11) . . ? 


C9 C10 H10A 110.0(12) . . ? 


C9 C10 H10B 112.0(12) . . ? 


H10A C10 H10B 104.1(16) . . ? 


C9 C10 H10C 111.6(12) . . ? 


H10A C10 H10C 105.5(16) . . ? 


H10B C10 H10C 113.2(16) . . ? 


C9 C11 H11A 111.0(12) . . ? 


C9 C11 H11B 109.2(12) . . ? 


H11A C11 H11B 109.7(17) . . ? 


C9 C11 H11C 109.5(12) . . ? 


H11A C11 H11C 106.9(17) . . ? 


H11B C11 H11C 110.5(18) . . ? 


C9 C12 H12A 108.1(12) . . ? 


C9 C12 H12B 113.3(12) . . ? 


H12A C12 H12B 107.9(17) . . ? 


C9 C12 H12C 112.8(12) . . ? 


H12A C12 H12C 106.8(16) . . ? 


H12B C12 H12C 107.8(17) . . ? 


C14 C13 C15 110.29(15) . . ? 


C14 C13 C16 108.82(15) . . ? 


C15 C13 C16 108.04(15) . . ? 


C14 C13 P1 108.40(12) . . ? 


C15 C13 P1 114.86(12) . . ? 


C16 C13 P1 106.22(11) . . ? 


C13 C14 H14A 108.9(13) . . ? 


C13 C14 H14B 113.2(13) . . ? 


H14A C14 H14B 107.1(18) . . ? 


C13 C14 H14C 112.4(12) . . ? 


H14A C14 H14C 107.1(17) . . ? 


H14B C14 H14C 107.9(17) . . ? 


C13 C15 H15A 111.2(11) . . ? 


C13 C15 H15B 110.9(11) . . ? 


H15A C15 H15B 110.3(15) . . ? 


C13 C15 H15C 106.9(12) . . ? 


H15A C15 H15C 108.7(16) . . ? 


H15B C15 H15C 108.7(16) . . ? 


C13 C16 H16A 105.1(12) . . ? 


C13 C16 H16B 112.7(13) . . ? 


H16A C16 H16B 109.1(17) . . ? 


C13 C16 H16C 113.2(12) . . ? 


H16A C16 H16C 109.0(17) . . ? 


H16B C16 H16C 107.7(17) . . ? 


C20 C17 C19 108.45(15) . . ? 


C20 C17 C18 109.54(14) . . ? 


C19 C17 C18 107.36(15) . . ? 


C20 C17 P2 114.61(12) . . ? 


C19 C17 P2 108.27(11) . . ? 


C18 C17 P2 108.37(12) . . ? 


C17 C18 H18A 113.2(12) . . ? 


C17 C18 H18B 112.4(12) . . ? 


H18A C18 H18B 106.0(17) . . ? 


C17 C18 H18C 108.8(13) . . ? 


H18A C18 H18C 106.5(17) . . ? 


H18B C18 H18C 109.7(17) . . ? 


C17 C19 H19A 109.5(14) . . ? 


C17 C19 H19B 111.2(12) . . ? 


H19A C19 H19B 108.3(18) . . ? 


C17 C19 H19C 113.6(12) . . ? 


H19A C19 H19C 104.9(18) . . ? 


H19B C19 H19C 108.9(16) . . ? 


C17 C20 H20A 108.8(13) . . ? 


C17 C20 H20B 112.3(13) . . ? 


H20A C20 H20B 108.8(18) . . ? 


C17 C20 H20C 111.1(12) . . ? 


H20A C20 H20C 107.6(18) . . ? 


H20B C20 H20C 108.1(18) . . ? 


C22 C21 C24 110.43(15) . . ? 


C22 C21 C23 107.41(15) . . ? 


C24 C21 C23 108.62(15) . . ? 


C22 C21 P2 109.81(12) . . ? 


C24 C21 P2 114.43(12) . . ? 


C23 C21 P2 105.80(11) . . ? 


C21 C22 H22A 112.1(13) . . ? 


C21 C22 H22B 110.0(14) . . ? 


H22A C22 H22B 110.8(19) . . ? 


C21 C22 H22C 109.0(12) . . ? 


H22A C22 H22C 108.3(17) . . ? 


H22B C22 H22C 106.4(18) . . ? 


C21 C23 H23A 110.6(12) . . ? 


C21 C23 H23B 111.7(13) . . ? 


H23A C23 H23B 111.5(17) . . ? 


C21 C23 H23C 107.5(11) . . ? 


H23A C23 H23C 108.4(16) . . ? 


H23B C23 H23C 106.9(16) . . ? 


C21 C24 H24A 108.5(12) . . ? 


C21 C24 H24B 110.4(13) . . ? 


H24A C24 H24B 106.6(17) . . ? 


C21 C24 H24C 110.7(14) . . ? 


H24A C24 H24C 108.8(18) . . ? 


H24B C24 H24C 111.7(19) . . ? 


 


loop_ 


 _geom_torsion_atom_site_label_1 


 _geom_torsion_atom_site_label_2 


 _geom_torsion_atom_site_label_3 


 _geom_torsion_atom_site_label_4 


 _geom_torsion 


 _geom_torsion_site_symmetry_1 


 _geom_torsion_site_symmetry_2 


 _geom_torsion_site_symmetry_3 


 _geom_torsion_site_symmetry_4 


 _geom_torsion_publ_flag 


Cl2 Fe1 P1 C7 105.57(6) . . . . ? 


N1 Fe1 P1 C7 11.26(7) . . . . ? 


Cl1 Fe1 P1 C7 -142.14(6) . . . . ? 


P2 Fe1 P1 C7 -33.06(7) . . . . ? 


Cl2 Fe1 P1 C9 -144.00(6) . . . . ? 


N1 Fe1 P1 C9 121.70(7) . . . . ? 


Cl1 Fe1 P1 C9 -31.71(6) . . . . ? 


P2 Fe1 P1 C9 77.37(6) . . . . ? 


Cl2 Fe1 P1 C13 -6.51(6) . . . . ? 


N1 Fe1 P1 C13 -100.82(7) . . . . ? 


Cl1 Fe1 P1 C13 105.78(6) . . . . ? 


P2 Fe1 P1 C13 -145.14(6) . . . . ? 


Cl2 Fe1 P2 C8 -57.79(6) . . . . ? 


N1 Fe1 P2 C8 35.94(6) . . . . ? 


Cl1 Fe1 P2 C8 -167.03(6) . . . . ? 


P1 Fe1 P2 C8 81.18(6) . . . . ? 


Cl2 Fe1 P2 C21 50.74(6) . . . . ? 


N1 Fe1 P2 C21 144.47(7) . . . . ? 


Cl1 Fe1 P2 C21 -58.50(6) . . . . ? 


P1 Fe1 P2 C21 -170.29(6) . . . . ? 


Cl2 Fe1 P2 C17 -169.64(6) . . . . ? 


N1 Fe1 P2 C17 -75.91(7) . . . . ? 


Cl1 Fe1 P2 C17 81.13(6) . . . . ? 


P1 Fe1 P2 C17 -30.66(7) . . . . ? 


Cl2 Fe1 N1 C2 -100.96(11) . . . . ? 


Cl1 Fe1 N1 C2 93.31(13) . . . . ? 


P1 Fe1 N1 C2 3.99(11) . . . . ? 


P2 Fe1 N1 C2 155.81(12) . . . . ? 


Cl2 Fe1 N1 C6 67.57(11) . . . . ? 


Cl1 Fe1 N1 C6 -98.16(12) . . . . ? 


P1 Fe1 N1 C6 172.52(11) . . . . ? 


P2 Fe1 N1 C6 -35.66(10) . . . . ? 


C6 N1 C2 C3 -5.2(2) . . . . ? 


Fe1 N1 C2 C3 163.34(12) . . . . ? 


C6 N1 C2 C7 168.58(14) . . . . ? 


Fe1 N1 C2 C7 -22.87(19) . . . . ? 


N1 C2 C3 C4 3.1(3) . . . . ? 


C7 C2 C3 C4 -170.52(15) . . . . ? 


C2 C3 C4 C5 0.5(3) . . . . ? 


C3 C4 C5 C6 -1.9(2) . . . . ? 


C2 N1 C6 C5 3.7(2) . . . . ? 


Fe1 N1 C6 C5 -165.18(12) . . . . ? 


C2 N1 C6 C8 -173.33(14) . . . . ? 


Fe1 N1 C6 C8 17.76(18) . . . . ? 


C4 C5 C6 N1 -0.2(2) . . . . ? 


C4 C5 C6 C8 176.79(15) . . . . ? 


N1 C2 C7 P1 33.51(19) . . . . ? 


C3 C2 C7 P1 -152.57(13) . . . . ? 


C9 P1 C7 C2 -148.41(12) . . . . ? 


C13 P1 C7 C2 94.87(13) . . . . ? 


Fe1 P1 C7 C2 -26.10(13) . . . . ? 


N1 C6 C8 P2 21.16(18) . . . . ? 


C5 C6 C8 P2 -155.93(13) . . . . ? 


C21 P2 C8 C6 -164.36(11) . . . . ? 


C17 P2 C8 C6 78.79(12) . . . . ? 


Fe1 P2 C8 C6 -42.74(11) . . . . ? 


C7 P1 C9 C12 -43.06(14) . . . . ? 


C13 P1 C9 C12 67.66(14) . . . . ? 


Fe1 P1 C9 C12 -153.25(10) . . . . ? 


C7 P1 C9 C11 -167.62(12) . . . . ? 


C13 P1 C9 C11 -56.90(13) . . . . ? 


Fe1 P1 C9 C11 82.19(12) . . . . ? 


C7 P1 C9 C10 76.43(12) . . . . ? 


C13 P1 C9 C10 -172.85(11) . . . . ? 


Fe1 P1 C9 C10 -33.76(12) . . . . ? 


C7 P1 C13 C14 -166.07(11) . . . . ? 


C9 P1 C13 C14 84.51(13) . . . . ? 


Fe1 P1 C13 C14 -55.43(12) . . . . ? 


C7 P1 C13 C15 70.08(14) . . . . ? 


C9 P1 C13 C15 -39.34(15) . . . . ? 


Fe1 P1 C13 C15 -179.28(11) . . . . ? 


C7 P1 C13 C16 -49.27(14) . . . . ? 


C9 P1 C13 C16 -158.69(12) . . . . ? 


Fe1 P1 C13 C16 61.37(13) . . . . ? 


C8 P2 C17 C20 67.31(14) . . . . ? 


C21 P2 C17 C20 -43.58(15) . . . . ? 


Fe1 P2 C17 C20 173.95(11) . . . . ? 


C8 P2 C17 C19 -53.87(13) . . . . ? 


C21 P2 C17 C19 -164.77(11) . . . . ? 


Fe1 P2 C17 C19 52.77(13) . . . . ? 


C8 P2 C17 C18 -170.03(12) . . . . ? 


C21 P2 C17 C18 79.08(13) . . . . ? 


Fe1 P2 C17 C18 -63.39(13) . . . . ? 


C8 P2 C21 C22 -165.99(12) . . . . ? 


C17 P2 C21 C22 -53.16(14) . . . . ? 


Fe1 P2 C21 C22 88.92(12) . . . . ? 


C8 P2 C21 C24 -41.17(15) . . . . ? 


C17 P2 C21 C24 71.67(15) . . . . ? 


Fe1 P2 C21 C24 -146.25(12) . . . . ? 


C8 P2 C21 C23 78.37(13) . . . . ? 


C17 P2 C21 C23 -168.79(12) . . . . ? 


Fe1 P2 C21 C23 -26.71(14) . . . . ? 


 


_diffrn_measured_fraction_theta_max    0.994 


_diffrn_reflns_theta_full              30.57 


_diffrn_measured_fraction_theta_full   0.994 


_refine_diff_density_max    0.618 


_refine_diff_density_min   -0.300 


_refine_diff_density_rms    0.075 
